# Supplementary material for: Recycling of Pretreated Polyolefin-Based Ocean-Bound Plastic Waste by Incorporating Clay and Rubber
Source: MDPI journal article supplement (doi:10.3390/recycling7020025), 2022-04-14
Supplement: s1 [file s1]

**Supporting Data**  
**Mechanical Recycling of Ocean-bound Plastic Waste by Incorporating Clay, Rubber, and**  
**Compatibilizers**

Shawn Martey<sup>a</sup>, Keith Hendren<sup>b</sup>, Nicholas Farfaras<sup>a</sup>, Jesse Kelly<sup>b</sup>, Matthew Newsome<sup>b</sup>, Izabela Ciesielska-Wrobel<sup>c</sup>,  
Margaret J. Sobkowicz<sup>a</sup>, Wan-Ting Chen<sup>a\*</sup>

<sup>a</sup>Department of Plastics Engineering, University of Massachusetts Lowell

<sup>b</sup>Luna Innovations Incorporated

<sup>a</sup>Department of Textiles, Fashion Merchandising and Design, University of Rhode Island

Number of pages: 3  
Number of figures: 2

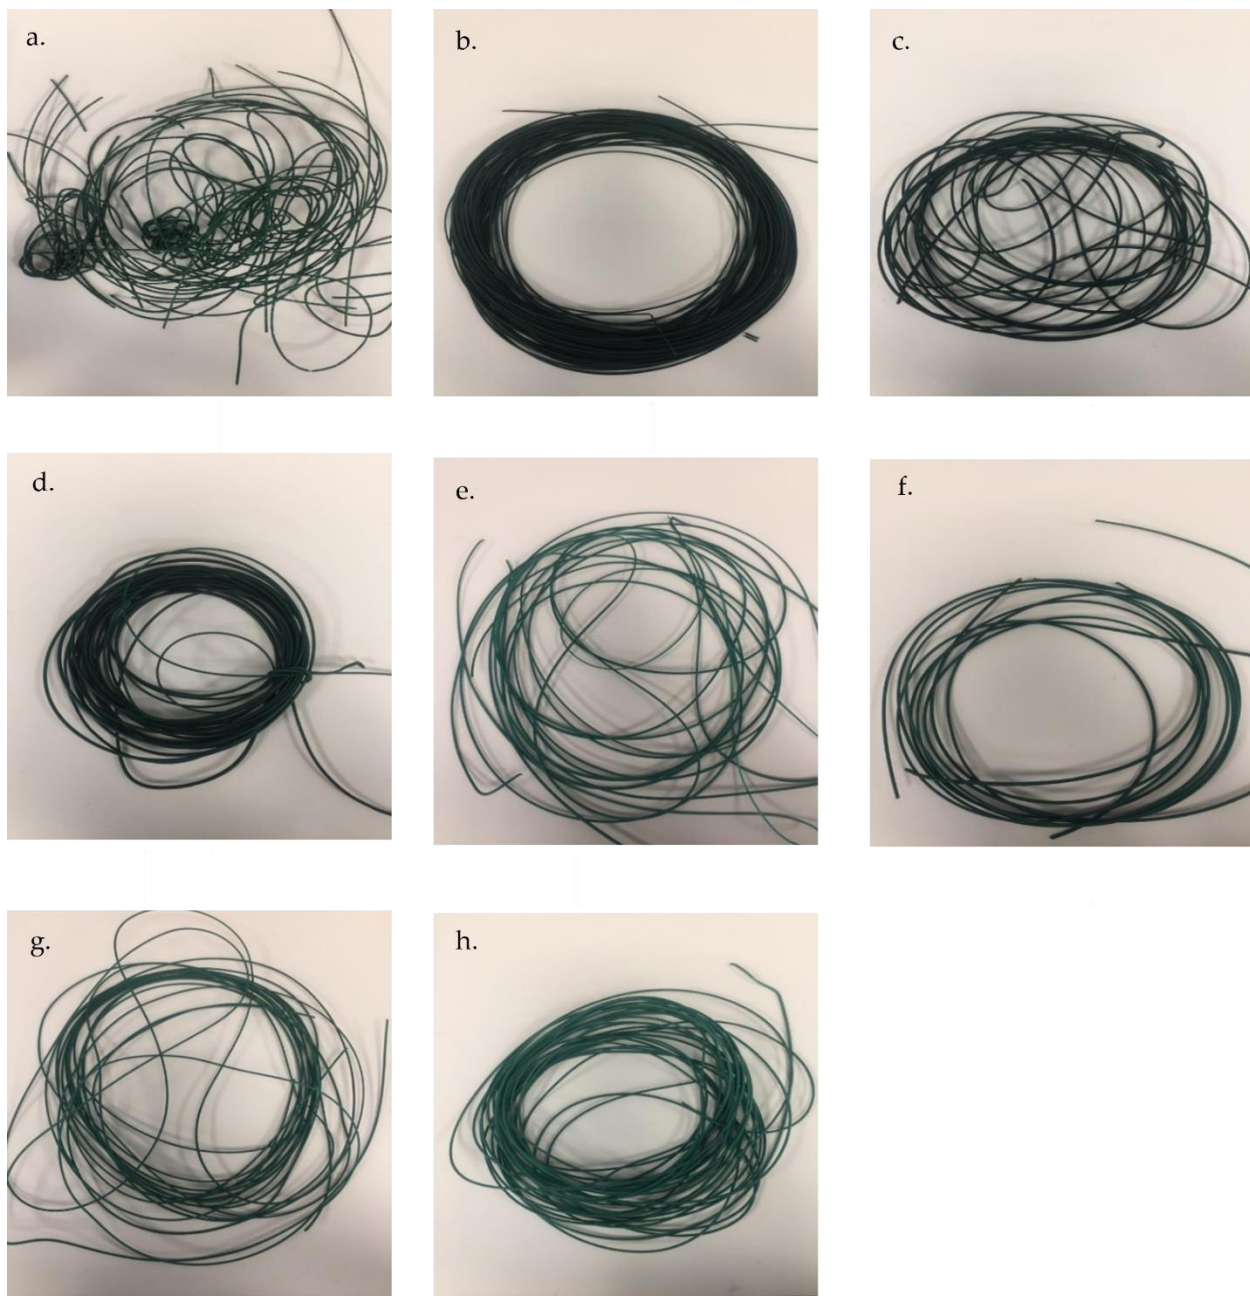

**Figure S1.** The blended samples composed of: **(a)** o-HDPE (23g) \_o-PP (23g)\_v-LDPE(23g)\_clay (30g); **(b)** o-HDPE (30g) \_o-PP (30g)\_v-LDPE(30g)\_clay (10%); **(c)** o-HDPE (33g) \_o-PP (33g)\_v-LDPE(33g); **(d)** o-HDPE (25g) \_o-PP(25g)\_v-LDPE(25g)\_EPR(25g), **(e)** o-HDPE (19g) \_o-PP (19g)\_v-LDPE(19g)\_v-PS(19g)\_SEBS(5g)\_EPR(19g), **(f)** o-HDPE (25g) \_o-PP (25g)\_v-LDPE(25g)\_v-PS(25g), **(g)** o-HDPE (23g) \_o-PP (23g)\_v-LDPE(23g)\_v-PS(23g)\_clay(10g), **(h)** o-HDPE (17g) \_o-PP (17g)\_v-LDPE(17g)\_v-PS(17g)\_clay(10g)\_SEBS(5g)\_EPR(17g).

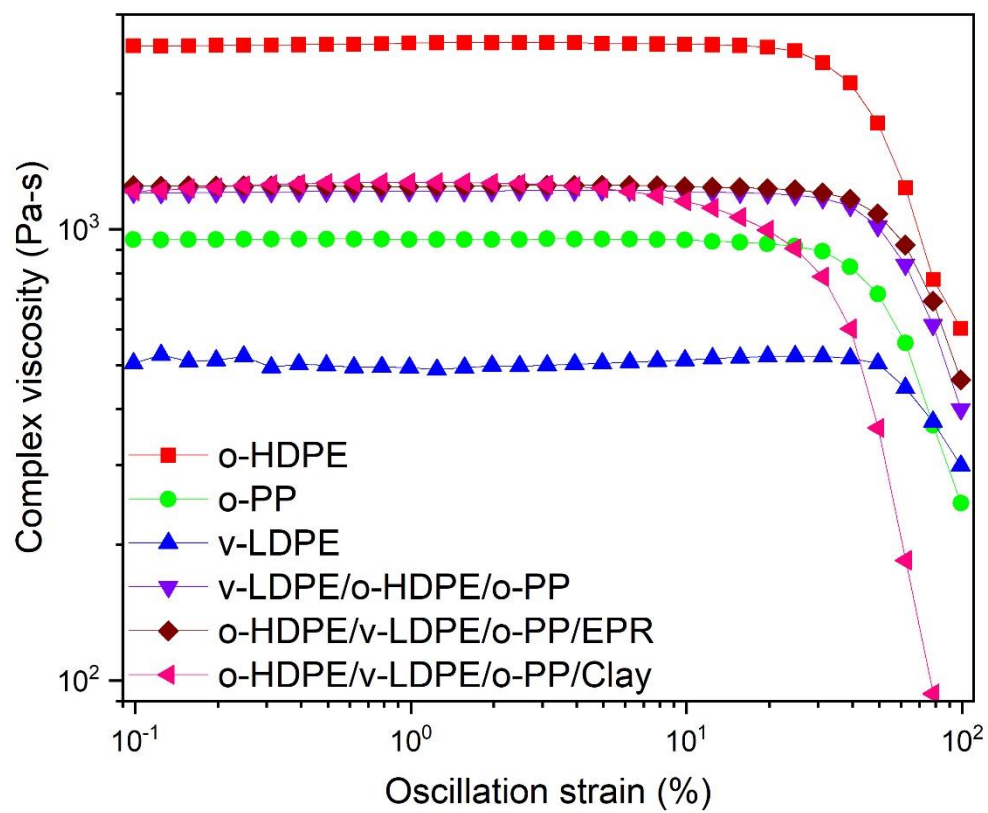

**Figure S2.** Strain sweep of samples.
